# Supplementary material
Source: publisher site journal article supplement (https://www.dovepress.com/article/430790)
Supplement: Supplementary file 1 [file get_supplementary_file.php]

**Appendix 1** Descriptive statistics of variables (*N*= 223)

| **Variable** | **n** | **%** | **Mean ± SD** |
| --- | --- | --- | --- |
| MDASI |  |  | 68.55 ± 15.79 |
| MDASI-Part Ⅰ |  |  | 37.68 ± 11.59 |
| MDASI-Part Ⅱ |  |  | 30.87 ± 6.21 |
| Fatigue | 223 | 100 | 6.11 ± 1.86 |
| Dry mouth | 222 | 99.55 | 6.03 ± 1.69 |
| Pain | 223 | 100 | 5.97 ± 1.53 |
| Lack of appetite | 221 | 99.10 | 3.56 ± 1.62 |
| Drowsiness | 197 | 88.34 | 3.49 ± 2.28 |
| Disturbed sleep | 195 | 87.44 | 3.44 ± 1.86 |
| Distress | 196 | 87.89 | 2.94 ± 1.89 |
| Sadness | 159 | 71.30 | 2.05 ± 1.83 |
| Nausea | 115 | 51.57 | 1.60 ± 1.80 |
| Difficulty remembering | 93 | 41.70 | 0.74 ± 1.02 |
| Shortness of breath | 71 | 31.84 | 0.65 ± 1.17 |
| Numbness | 69 | 30.94 | 0.57 ± 1.04 |
| Vomiting | 45 | 20.18 | 0.52 ± 1.17 |
| CD-RISC |  |  | 73.40 ± 11.13 |
| Tenacity |  |  | 36.96 ± 6.86 |
| Strength |  |  | 25.44 ± 3.90 |
| Optimism |  |  | 11.00 ± 1.82 |
| HADS |  |  | 12.37 ± 6.03 |
| Anxiety (score ≥ 8) | 78 | 34.98 | 6.21 ± 3.11 |
| Depression (score ≥ 8) | 64 | 28.70 | 6.16 ± 3.23 |

Abbreviations: SD, standard deviation.
